1  
2  
3  
4  
5  
6  
7  
8  
9  
10  
11  
12  
13  
14  
15  
16  
17  
18  
19  
20

## **N1-methyladenine safeguards against aberrant RNA-protein association during proteostasis stress**

Marion Alriquet,<sup>1,2</sup> Giulia Calloni,<sup>1,2</sup> Adrián Martínez-Limón,<sup>1,2</sup> Riccardo Delli Ponti,<sup>3,4</sup> Gerd Hanspach,<sup>5</sup> Martin Hengesbach,<sup>5</sup> Gian G. Tartaglia,<sup>3,4,6,7, \*</sup> R. Martin Vabulas<sup>1,2, \*</sup>

<sup>1</sup>Buchmann Institute for Molecular Life Sciences, Goethe University Frankfurt, Frankfurt am Main, Germany.

<sup>2</sup>Institute of Biophysical Chemistry, Goethe University Frankfurt, Frankfurt am Main, Germany.

<sup>3</sup>Centre for Genomic Regulation (CRG), The Barcelona Institute for Science and Technology, Barcelona, Spain.

<sup>4</sup>ICREA and Universitat Pompeu Fabra (UPF), Barcelona, Spain.

<sup>5</sup>Institute for Organic Chemistry and Chemical Biology, Goethe University Frankfurt, Frankfurt am Main, Germany.

<sup>6</sup>Department of Biology ‘Charles Darwin’, Sapienza University of Rome, Rome, Italy.

<sup>7</sup>Department of Neuroscience and Brain Technologies, Istituto Italiano di Tecnologia, Genoa, Italy.

\*Corresponding author. Email: [vabulas@em.uni-frankfurt.de](mailto:vabulas@em.uni-frankfurt.de) (R.M.V.); [gian.tartaglia@crg.eu](mailto:gian.tartaglia@crg.eu) (G.G.T.)

21 **Abstract**

22 Post-transcriptional modifications of nucleotide bases can effect several aspects of mRNA function.  
23 For example, the recent work has established the role of m<sup>6</sup>A in the coordinated regulation of  
24 transcriptome turnover and translation during cellular differentiation and tumorigenesis. The levels  
25 of m<sup>1</sup>A in mRNAs reach up to 10% of those of m<sup>6</sup>A, yet the functional consequences of this  
26 modification are much less clear. Here we show that N1-methyladenine protects mRNAs against  
27 aberrant interactions during heat shock and amyloidogenesis in mammalian cells. The m<sup>1</sup>A  
28 methylation motif correlated with the enhanced sequestration of transcripts in stress granules (SG).  
29 The cognate methyltransferase TRMT6/61A accumulated and m<sup>1</sup>A was enriched in SG.  
30 Downregulation of the catalytic subunit TRMT61A enhanced amyloidogenesis in the cytosol and  
31 increased bystander protein and RNA co-aggregation with A $\beta$  aggregates. Faulty granulation of  
32 mutant RNAs has been implicated in pathogenesis of protein aggregation disorders. Our results  
33 demonstrate that also normal mRNAs succumb to co-aggregation with proteins if RNA dynamics  
34 during stress is disturbed due to the insufficient N1-adenine methylation.

35 The target motif for the N1-adenine methylation on mRNAs by TRMT6/61 has been identified (*1*,  
36 2). We analyzed its presence in SG-sequestered mRNAs (*3*) using a motif which can form an at least  
37 two base pair-long stem (Fig. 1a). The analysis revealed that TRMT6/61A-targeted transcripts were  
38 enriched in SGs (Fig. 1b). Two GO categories in SG-sequestered mRNAs with the m<sup>1</sup>A motif were  
39 significantly increased: “Regulation of RNA metabolic processes” (1.7x, 59 proteins) and  
40 “Axonogenesis” (4.6x, 13 proteins). The latter category represents an intriguing hit (Fig. S1a)  
41 because the build-up of the long process of a neuron requires packing and transport of RNA granules  
42 to the sites of local translation (*4*). The enrichment of axonogenesis proteins suggests that the m<sup>1</sup>A-  
43 related granulation is not restricted to stress conditions but might be a more general mechanism of  
44 the mRNA metabolism. Structurally, the m<sup>1</sup>A-motif containing SG-enriched transcripts were longer  
45 than control mRNAs (Fig. S1b).

46 Next, TRMT61A-deficient cells were prepared and named “knock-downs” (KD) because of the  
47 residual levels of the catalytic subunit (Fig. S1c). Protein synthesis and cellular viability were not  
48 significantly changed and the proliferation was only slightly slower in KD cells (Fig. S1d-f). Heat  
49 shock for 60 min did not change the amount of m<sup>1</sup>A in tRNAs (Fig. 1c and Fig. S1g), yet affected  
50 cellular viability correlating with TRMT61A levels (Fig. 1d). Similarly, TRMT61A activity was  
51 needed to protect cells from another acute proteostasis stressor, arsenite (Fig. S1h, i).

52  
53 N1-adenine methylation on mRNAs is known to increase upon heat shock (*5*), which suggests the  
54 link between m<sup>1</sup>A in mRNAs and the impaired survival of KD cells. In support, TRMT6/61A  
55 methyltransferase localized to SG under stress (Fig. 2a and Fig. S2a). To quantify N1-methyladenine  
56 accumulation in SG by mass spectrometry, we established SG isolation (*6*) and targeted selected ion  
57 monitoring procedures (Fig. S2b-d). A significant enrichment of m<sup>1</sup>A (calculated as m<sup>1</sup>A/A fraction)  
58 in SG was detected as compared to cytosolic mRNAs (Fig. 2b). The origin of the signal from

59 ribosomes in SG can be excluded, because the only m<sup>1</sup>A on human ribosome is on the 60S subunit  
60 (7), which is excluded from SG (8).

61 To test functionally whether TRMT6/61A can protect mRNAs during proteostasis stress, m<sup>1</sup>A motif-  
62 containing reporters were generated and analyzed. An m<sup>1</sup>A motif from the 5'-UTR of the PRUNE1  
63 transcript (1, 2) was inserted into the 5'-UTR of an Ubiquitin-EGFP (UbE) construct (Fig. 2c, Fig.  
64 S2e). The UbE protein is highly unstable and its accumulation can be detected with the precision of  
65 several minutes upon inhibition of proteasomal degradation in HeLa cells (9). Consequently, the  
66 accumulation of the UbE protein would indicate the functional amount of its coding mRNA in the  
67 cytosol at the time-point when degradation and transcription are inhibited. In parallel to the wild-type  
68 reporter WT-UbE, a control reporter MUT-UbE with mutated adenine was generated and tested under  
69 normal conditions (Fig. 2d). To test the reporters during heat shock and recovery, transcription of  
70 new mRNA was inhibited (Fig. S2f). Notably, heat-misfolded proteins overloaded the proteasomal  
71 capacity leading to small accumulation of protein from MUT-UbE (Fig. 2e, lane 4), which suggested  
72 that heat-related inactivation of MUT-UbE mRNA was less efficient. Oppositely, upon returning to  
73 37°C, the protein from WT-UbE accumulated significantly more (Fig. 2e). These data indicate that  
74 the m<sup>1</sup>A motif-containing mRNA 1) during heat shock are sequestered more efficiently and 2) during  
75 recovery became functional again faster.

76  
77 We analyzed whether the impaired dynamics of mRNA in cytosol can aggravate protein aggregation.  
78 The amyloid- $\beta$  peptide A $\beta$ <sub>1-42</sub> fused to GFP (A $\beta$ -GFP) was used to this end. Western blot analysis  
79 revealed an enhanced accumulation of A $\beta$ -GFP in KD cells (Fig. 3a). Fluorescence microscopy  
80 confirmed the reduced capacity of the TRMT61A-deficient cells to constrain amyloidogenesis (Fig.  
81 3b and Fig. S3a). The reintroduction of TRMT6/61A activity into KD cells significantly suppressed

82 aggregation (Fig. 3c). Enzymatically impaired TRMT61A mutant D181A was less efficient in this  
83 suppression (Fig. S3b), which argues for the necessity of enzymatic function for mRNA safeguarding.  
84 We wondered if the m<sup>1</sup>A tag can rescue its containing transcripts also under chronic proteostasis  
85 stress imposed by amyloidogenesis. Reporters encoding NAD(P)H:quinone oxidoreductase 1  
86 (NQO1), a stable human protein, were prepared (Fig. 3d and Fig. S3c). Transient co-expression of  
87 WT-NQO1 with A $\beta$ -GFP resulted in reduced accumulation of the reporter protein (Fig. 3e).  
88 However, this effect was significantly stronger in the case of MUT-NQO1. The amounts of both  
89 reporter mRNAs were similar as confirmed by quantitative PCR (Fig. S3d), which suggests that the  
90 methylation of adenine in the TRMT6/61A motif was needed to sustain the functionality of the  
91 reporter mRNA in the presence of amyloid. On the other side, accumulation of NQO1 from wild-  
92 type and mutant reporters was similar when compared in KD cells supporting the centrality of the  
93 TRMT6/61A-dependent mechanism (Fig. S3e). The difference between reporter functionality in the  
94 presence of A $\beta$ -GFP could be reproduced in another cell line, the murine melanoma B16-F10 (Fig.  
95 S3f).

96  
97 Aberrant protein-protein interactions are known to be important for proteotoxicity (10, 11).  
98 Mechanistically, we entertained the possibility that mislocalized mRNAs become entrapped in  
99 protein aggregates and enhance protein co-aggregation. To test this assumption, A $\beta$ -GFP was  
100 overexpressed, its aggregates isolated two days later and analyzed. Mass spectrometry quantification  
101 revealed strongly increased co-aggregation of cellular proteins with the A $\beta$  amyloid when the activity  
102 of TRMT6/61A was suppressed (Fig. 4a, Table S1 and S2). Based on five biological repetitions, we  
103 identified 244 proteins significantly enriched in aggregates in KD cells. There was a considerable  
104 overlap between those proteins and the smaller set of 80 co-aggregators from wild-type cells (Fig.  
105 4b). The difference between the sets turned out to be revealing, because the co-aggregome from KD

106 cells contained four functional categories which were not present in the WT set (Fig. 4c). The top-  
107 two category was “mRNA binding”, which supported the notion of aberrant sequestration of mRNAs  
108 in protein aggregates. In this scenario, amyloid-associated mRNA would attract mRNA binding  
109 proteins thus propagating aberrant protein-protein interactions. To verify this interpretation directly,  
110 we used polyT-beads to isolate cellular mRNAs from wild-type and KD cells. Indeed, mRNA  
111 association with the amyloid was significantly higher in the KD cells (Fig. 4d). Note the difference  
112 of A $\beta$ -GFP accumulation in Fig. 3a (two days after transfection) and Fig. 4d (one day after  
113 transfection). We deliberately chose to look for aberrant RNA-protein interactions at an earlier time-  
114 point to support their causative relevance for the increased amyloidogenesis.

115  
116 The enhanced amyloidogenesis and increased mRNA co-aggregation in cells is surprising given the  
117 small size of the adenine modification. To explain the far-reaching consequences of the missing small  
118 tag, one is tempted to consider the changes of RNA dynamics. It is known that m<sup>1</sup>A blocks base-  
119 pairing and induces local melting in RNA molecules (12). Together with the fact that the secondary  
120 structure of mRNAs is able to determine the specificity of membraneless compartments in cells (13),  
121 it offers a possible explanation for the aberrant RNA-RNA and RNA-protein associations when  
122 TRMT6/61A activity is impaired. mRNAs can be exposed and freed from polysomes following  
123 protein synthesis attenuation which takes place upon diverse stressors (14, 15). Indeed, our finding  
124 of mRNA and A $\beta$ -GFP co-aggregation (Fig. 4d) supports the notion that RNAs lose their native  
125 associations not only during heat shock. The enrichment of mRNA binders among the co-aggregators  
126 under these conditions suggests a pathogenetic relevance of the aberrant RNA-protein association.  
127 RNA repeat expansion disorders provide examples of clinical consequences caused by the RNA  
128 binding protein entrapment (16). Our study now demonstrates that also normal RNAs can get  
129 involved in similar pathogenic loops.

130 Two questions remain to be answered regarding the model our data propose (Fig. S4). First, the  
131 appearance of free mRNA due to the translation impairment under different conditions has to be  
132 elucidated. This challenge is especially pressing for the chronic proteostasis stress during  
133 amyloidogenesis, where translation factor co-aggregation and protein synthesis defects have been  
134 documented (11, 17). Second, the extent and mechanism of the m<sup>1</sup>A-tagged mRNA involvement in  
135 the protective sequestration of non-methylated mRNAs have to be clarified. The importance of RNA-  
136 RNA interactions in sequestration processes have been demonstrated in different experimental  
137 settings (13, 18).

138 **Materials and Methods**

139

140 **Reagents, Plasmids, Antibodies**

141 2,3-Bis(2-methoxy-4-nitro-5-sulfophenyl)-2*H*-tetrazolium-5-carboxanilide inner salt (XTT),  
142 phenazine methosulfate (PMS) and cycloheximide were from Sigma-Aldrich, TRIZOL and RiboGreen  
143 were from Invitrogen. All other chemicals were from Sigma-Aldrich unless otherwise indicated.

144 A $\beta$ -EGFP, Flag-tagged TRMT6 and TRMT61A mammalian expression vectors were purchased from  
145 Genscript. Two additional Flag tags were inserted into the vector coding TRMT61A. Luciferase  
146 expression vector under T7 promoter was from Promega. Human HSP70 under T7 promoter was  
147 cloned into pCH16 vector (a kind gift of H.-C. Chang) for in vitro transcription.

148 The following antibodies were used: anti-TRMT6 (A303-008A-M) from Bethyl; anti-TRMT61A (sc-  
149 107105) from Santa Cruz Biotechnology; anti-eIF2 $\alpha$  (9722), anti-eIF2 $\alpha$  (phosphor-Ser51) (3398),  
150 anti-eIF4E (9742), HRP-conjugated anti-rabbit-IgG (7074) and Alexa Fluor 647-conjugated anti-  
151 rabbit IgG (4414) from Cell Signaling; anti-Flag (F1804) and HRP-conjugated anti-mouse IgG  
152 (A9044) from Sigma-Aldrich.

153

154 **Constructs**

155 Expression constructs generated for this study were prepared by standard molecular biology  
156 techniques and coding sequences were verified. Two additional Flag tags were inserted into the  
157 vector coding TRMT61A. An m1A motif from human PRUNE1 5'-UTR was introduced into the  
158 Ubiquitin-EGFP construct (9) to prepare WT-UbE reporter. The motif was mutated such that the to-  
159 be methylated adenine was exchanged into uracil to prepare MUT-UbE. Similarly, a 3xFLAG-NQO1  
160 eukaryotic expression vector (19) was modified to introduce an m1A motif upstream the coding  
161 sequence to construct WT-NQO1 reporter. This motif was mutated as above to prepare MUT-NQO1.

162



163 **Cell Lines**

164 The HeLa WT and TRMT61A KD cell lines were cultured in DMEM supplemented with 10%  
165 (vol/vol) FBS, 2 mM L-glutamine, 100 IU/mL penicillin G, 100 µg/mL streptomycin sulfate, and  
166 nonessential amino acids. HeLa cells with low levels of TRMT61A were prepared from HeLa WT  
167 cells by transfection with 1 µg TRM61A Double Nickase Plasmids (h) mix and selection with  
168 puromycin.

169 The B16-F10 cell line was cultured in DMEM supplemented with 10% (vol/vol) FBS, 2 mM L-  
170 glutamine, 100 IU/mL penicillin G, 100 µg/mL streptomycin sulfate, and nonessential amino acids.

171

172 **Transfections**

173 For Aβ aggregation,  $4 \times 10^6$  HeLa cells were electroporated with 30 µg Aβ-GFP or GFP expression  
174 vectors and seeded on polylysine-coated cover slides on a 12-well plate at  $5 \times 10^5$  cells/well. The  
175 medium was refreshed after 6 h. The cells were processed for microscopy or collected and lysed with  
176 SDS sample buffer for western blotting 48 h after transfection. For methylation reconstitution,  $8 \times 10^6$   
177 HeLa TRMT61A KD cells were transfected by electroporation with 10 µg Aβ-GFP with or without  
178 20 µg Flag-TRMT6 and 20 µg 3xFlag-TRMT61A. The cells were lysed 48 h after transfection. For  
179 analysis of the enzymatically impaired TRMT61A mutant D181A, HeLa TRMT61A KD cells were  
180 seeded in a 12-well plate at  $1 \times 10^5$  cells/well. Next day, cells were cotransfected with 1 µg Aβ-GFP  
181 and 1 or 2 µg TRMT61A WT or D181A using polyethylenimine (the ratio DNA:PEI was 1:6 using  
182 1 mg/mL PEI solution). The cells were lysed 24 h after transfection.

183

184 **Cellular Viability Assay**

185 HeLa cells were seeded at  $1.25 \times 10^4$  cells/well in duplicates in a 48-well plates in 200 µL DMEM  
186 supplemented with 25 mM Hepes NaOH pH 7.5. The plates were immediately placed in an incubator  
187 at 37°C or 45°C for 2 h and then back to 37°C. 14 h later, medium in each well was discarded and

188 replaced by 200  $\mu$ L DMEM with 0.33 mg/mL XTT + 12.5  $\mu$ g/mL PMS (Scudiero et al., 1988). After  
189 2 h of incubation at 37°C,  $A_{475}$  and  $A_{600}$  were measured. Duplicates were averaged and specific  
190 absorbance calculated. To compare sensitivity to arsenite, HeLa WT and TRMT61A KD cells were  
191 seeded in two 48-well plates at  $1.25 \times 10^4$  cells/well in triplicates. Next day, the cells were treated with  
192 arsenite for 1 h at 37°C. The cells were washed with PBS, then 200  $\mu$ L 0.33 mg/mL XTT + 12.5  
193  $\mu$ g/mL PMS in DMEM was added per well. After 4 h of incubation at 37°C,  $A_{475}$  and  $A_{600}$  were  
194 measured. Triplicates were averaged and specific absorbance was calculated.

195

### 196 **A $\beta$ -GFP Pulldowns for Mass Spectrometry Analysis**

197  $8 \times 10^6$  WT or TRMT61A knock-down HeLa cells were transfected by electroporation with 30  $\mu$ g A $\beta$ -  
198 GFP or 10  $\mu$ g GFP. 48 h after transfection, the cells were washed two times with PBS and  
199 resuspended in 300  $\mu$ L Lysis buffer (10 mM Tris HCl pH 7.4, 100 mM KCl, 5 mM MgCl<sub>2</sub>, 0.5%  
200 Deoxycholate, 1% Triton X-100) supplemented with Phosphatase Inhibitor cocktail 2 (1:100),  
201 RNasin (1:1000) and Protease inhibitor (1x). The cells were kept on ice for 20 min, then centrifuged  
202 at 10,000g at 4°C for 5 min. Supernatants were collected and protein concentration was normalized  
203 to 1  $\mu$ g/ $\mu$ L. 200  $\mu$ L of each lysate were diluted with 300  $\mu$ L Dilution buffer (10 mM Tris HCl pH 7.4,  
204 100 mM KCl, 5 mM MgCl<sub>2</sub>) supplemented with RNasin (1:1000) and Protease inhibitor (1x). For  
205 each sample, 10  $\mu$ L GFP-Trap Magnetic Agarose were washed three times with dilution buffer. 450  
206  $\mu$ L of each lysate were added to 10  $\mu$ L washed agarose and incubated at 4°C for 1 h with gentle  
207 shaking. The agarose was washed three times with Dilution buffer supplemented with RNasin and  
208 Protease Inhibitor and three times with 50 mM Tris HCl pH 7.4, 150 mM NaCl. The agarose was  
209 frozen at -80°C until further processing for mass spectrometry.

210

### 211 **PolyT Pulldowns of A $\beta$ -GFP**

212  $4 \times 10^6$  HeLa cells were electroporated with 30  $\mu\text{g}$  A $\beta$ -GFP or 10  $\mu\text{g}$  GFP expression vectors and  
213 seeded in 10 cm dishes (one transfection per dish). 24 h after transfection, the cells were washed  
214 twice with ice-cold PBS and resuspended in 300  $\mu\text{L}$  lysis buffer (10 mM Tris HCl pH 7.4, 100 mM  
215 KCl, 5 mM MgCl<sub>2</sub>, 0.5% sodium deoxycholate, 1% Triton X-100) supplemented with Phosphatase  
216 inhibitor cocktail 2 (1:100) and RNasin (1:1000). After a 15 min incubation on ice, the lysates were  
217 centrifuged at 10,000 g for 5 min at 4°C. The protein concentration of the supernatants was measured  
218 and normalized. 350  $\mu\text{L}$  lysate were added to 50  $\mu\text{L}$  of washed Oligo d(T)<sub>25</sub> Magnetic beads and  
219 incubated at RT for 30 min. The beads were washed 3x with lysis buffer and resuspended in 10  $\mu\text{L}$   
220 lysis buffer supplemented with 250 units of Benzonase for elution. After 15 min at 37°C, the  
221 supernatant was collected and analyzed by SDS-PAGE and western blotting using anti-GFP antibody.

222

### 223 **WT-UbE and MUT-UbE Reporter Assay**

224 HeLa cells were seeded in a 12-well plate at  $1 \times 10^5$  cells per well. Next day, they were transfected  
225 with 300 ng reporter constructs using polyethylenimine (PEI) (the ratio DNA:PEI was 1:6 using a 1  
226 mg/mL PEI solution). 24 h after transfection, the cells were treated with 20  $\mu\text{M}$  MG-132 for 3 h,  
227 collected and analyzed by western blotting using anti-GFP and anti-GAPDH antibodies.

228 For the heat shock recovery assay,  $12 \times 10^6$  HeLa cells were electroporated with 20 to 30  $\mu\text{g}$  WT-UbE  
229 or MUT-UbE and seeded into two 10-cm dishes per transfection. 5 h later, cells were collected,  
230 washed and resuspended in serum-free DMEM supplemented with 25 mM Hepes NaOH pH 7.5 and  
231 10  $\mu\text{M}$  Actinomycin D. The cells were heated at 45°C for 30 min and then transferred to 37°C for  
232 recovery (timepoint 0). During recovery at timepoints 0, 15 and 30 min, aliquots were collected  
233 directly into the pre-heated SDS sample buffer and then analyzed by western blotting using anti-GFP  
234 and anti-GAPDH antibodies. To quantify the accumulation of newly synthesized reporter protein, the  
235 amount of UbE at timepoint 0 was subtracted.

236

### 237 **WT-NQO1 and MUT-NQO1 Reporter Assay**

238 HeLa cells were seeded in a 12-well plate at  $1 \times 10^5$  cells per well. Next day, they were transfected  
239 with 250 ng reporter constructs and different amounts of A $\beta$ -GFP construct (0 ng, 250 ng, 500 ng or  
240 1000 ng) using PEI (the ratio DNA:PEI was 1:6 using a 1 mg/mL PEI solution). 24 h after  
241 transfection, cells were collected and analyzed by SDS-PAGE and western blotting using anti-GFP  
242 and anti-GAPDH antibodies. For quantitative comparison, NQO1 amount per unit of A $\beta$ -GFP was  
243 calculated by multiplying the respective NQO1 and A $\beta$ -GFP values. Then, the average for all three  
244 A $\beta$ -GFP concentrations was calculated. The average for WT-NQO1 reporter was set as 1.

245

### 246 **Fluorescence Microscopy**

247 For TRMT6/61A and stress granule colocalization analysis, HeLa cells were electroporated with 15  
248  $\mu$ g each Flag-tagged TRMT6 and TRMT61A and seeded at  $0.5 \times 10^6$  cells/well in a 12-well plate on  
249 polylysine-coated slides. 24 h after transfection, medium was replaced by serum-free DMEM for  
250 additional 2 h. The cells were treated with 0.25 mM arsenite for 30 min, washed with PBS and fixed  
251 with 3.7% paraformaldehyde/PBS for 9 minutes at RT. They were then permeabilized with acetone  
252 at  $-20^\circ\text{C}$  for 5 min, blocked with 1% BSA/PBS for 1 h at RT and incubated with anti-TIAR in 1%  
253 BSA/PBS at RT for 1 h. Incubation with anti-Rabbit IgG-AlexaFluor647 and anti-Flag M2-Cy3 was  
254 done in 1% BSA/PBS at RT for 1 h, followed by three washing steps with PBS and DAPI staining.  
255 Slides were mounted in PBS and imaged. ImageJ (20) was used to compare fluorescence profiles  
256 along a set line.

257 To compare stress granule formation upon arsenite treatment, HeLa WT and TRMT61A KD cells  
258 were seeded in a 12-well plate with polylysine-coated cover slides at  $1.5 \times 10^5$  cells/well. Next day,  
259 medium was replaced by serum-free medium and the cells were kept at  $37^\circ\text{C}$  for 2 h. Arsenite was

260 then added at 0.0625 mM for 30 min at 37°C. Cells were washed with PBS, fixed with 3.7%  
261 paraformaldehyde at RT for 10 min, permeabilized with acetone at -20°C for 5 min, blocked with 1%  
262 BSA/PBS for 1 h at RT and incubated with anti-TIAR for 1 h. Incubation with anti-Rabbit-IgG Alexa  
263 Fluor647 conjugate for 1 h, three washes with PBS and staining with DAPI followed. Slides were  
264 imaged using a Zeiss LSM-780 inverted confocal microscope with a 63x oil immersion objective.  
265 The experiment was performed in triplicates and at least 200 cells were analyzed per condition and  
266 per repetition. Quantification was performed using CellProfiler by detecting nuclei and identifying  
267 by propagation from the nuclei. SGs were identified and counted within each cell.  
268 For aggregation analysis, HeLa cells transfected with A $\beta$ -GFP or control GFP were fixed 48 h after  
269 transfection with 4% paraformaldehyde/PBS at RT for 1 h and stained with DAPI. Cells were imaged  
270 using a Zeiss LSM-780 inverted confocal microscope with a 40x oil immersion objective. Using  
271 CellProfiler, nuclei were detected and cells identified by propagation from the nuclei. Fluorescence  
272 intensity was measured for each cell. Dead or dying cells were filtered out based on intensity values.  
273 The experiment was performed in triplicates and at least 200 GFP-positive cells were analyzed per  
274 condition and per repetition to determine the fraction of cells with aggregates.

275

## 276 **Quantitative PCR**

277 Total RNA was extracted with TRIzol. cDNAs were prepared using RevertAid kit and diluted 10x.  
278 Reporter and GAPDH sequences were amplified using respective primers and KiCqStart SYBR  
279 Green qPCR ReadyMix. The cycling conditions used were the following: 3 min at 95°C, 39x (15 sec  
280 95°C, 30 sec 58°C, 15 sec 72°C). Each reaction was performed in triplicates and results were analyzed  
281 as described (21) with GAPDH as a reference. Analysis was performed using the CFX Manager  
282 Software (Bio-Rad).

283

## 284 **tRNA Isolation for HPLC Analysis**

285 RNAs shorter than 200 nucleotides were extracted using mirVana miRNA Isolation kit. The extracted  
286 RNAs were separated in an 8% Polyacrylamide-TBE-urea gel, the tRNA band was visualized by UV  
287 shadowing and cut out of the gel. The gel pieces were incubated overnight with 0,5 M ammonium  
288 acetate at 25°C and 600 rpm. Next day, the gel pieces were discarded and 1 mL 100% ethanol was  
289 added per 400 µL of extract. The mixture was incubated at - 80°C for 1 hour and tRNAs were pelleted  
290 at 17.000 g for 30 minutes at 4°C. Pellets were washed with 70% ethanol, air-dried and frozen until  
291 further processing.

292

### 293 **HPLC Analyses**

294 tRNA pellets were resuspended with 16 µL of MS grade water and digested to nucleosides by  
295 incubation with 0.1 U nuclease P1 and 0.1 U bacterial alkaline phosphatase BAP C75 in P1 buffer  
296 (20 mM NH<sub>4</sub>OAc pH 5.3) at 37 °C for 1 h. Chromatographic separation was performed on an  
297 UltiMate 3000 HPLC (Thermo Fisher Scientific) equipped with a diode array detector (DAD). 5 µL  
298 of the nucleoside mixture were loaded on a Synergy Fusion RP column (4 mm particle size, 80Å pore  
299 size, 250 mm length, 2 mm inner diameter) from Phenomenex (Aschaffenburg, Germany) with 100%  
300 buffer A (5 mM NH<sub>4</sub>OAc pH 5.3) and separated at 35°C with a flow rate of 0.35 ml/min using a  
301 linear gradient of buffer B (100% acetonitril) to 20% in 20 min, then to 40% in 2 min. At the end of  
302 the gradient the column was washed with 95% buffer B for 7 min and re-equilibrated with buffer A  
303 for 4 min. The nucleosides were monitored by recording the UV chromatogram at 254 nm.

304

### 305 **Quantification of Modified Nucleotides by Mass Spectrometry**

306 Stress granules were prepared as described (6) omitting the affinity purification step. HeLa cells were  
307 treated with 0.5 mM Arsenite at 37°C for 60 min, washed, pelleted and flash-frozen in liquid nitrogen.  
308 The pellets were thawed, resuspended in 500 µL lysis buffer (50 mM Tris HCl pH 7.4, 100 mM  
309 potassium acetate, 2 mM magnesium acetate, 0.5 mM DTT, 50 µg/mL Heparin, 0.5% NP40, Protease

310 inhibitor and RNasin), passed seven times through a 26 G needle and centrifuged at 1000 g for 5 min  
311 at 4°C. The lysate was transferred to a new tube and centrifuged at 17000 g for 20 min at 4°C. The  
312 resulting supernatant was called ‘Soluble 1’. The pellet was resuspended in 500 µL lysis buffer and  
313 centrifuged again at 17000 g for 20 min at 4°C. The resulting supernatant was called ‘Soluble 2’. The  
314 pellet was resuspended in 150 µL lysis buffer, spun at 850 g for 2 min at 4°C. The supernatant  
315 was called ‘SG pellet’ and constituted the stress granule core enriched fraction. Total RNA was  
316 extracted from the SG pellet by Trizol extraction and RNA precipitation and stored at -80°C until  
317 MS analysis.

318 PolyA mRNA for comparison was prepared from HeLa cells heated at 45°C for 60 min. The cells  
319 were lysed in 500 µL lysis buffer (20 mM Tris HCl pH 7.5, 500 mM LiCl, 0,5% LiDS, 1 mM EDTA,  
320 5 mM DTT), incubated at RT for 5 min and passed 5x through a 20 G needle. The lysate was added  
321 to 100 µL of washed Oligo-d(T)25 Magnetic beads and incubated at RT for 10 min. The beads were  
322 washed 2x with WB-I (20 mM Tris HCl pH 7.5, 500 mM LiCl, 0,1% LiDS, 1 mM EDTA, 5 mM  
323 DTT), 2x with WB-II (20 mM Tris-HCl pH 7.5, 500 mM LiCl, 1 mM EDTA) and 1x with Low Salt  
324 Buffer (20 mM Tris HCl pH 7.5, 200 mM LiCl, 1 mM EDTA). The beads were resuspended in 100  
325 µL Elution buffer (20 mM Tris HCl pH 7.5, 1 mM EDTA), mRNAs were eluted by heating at 50°C  
326 for 2 min, precipitated and stored at -80°C until MS analysis.

327 RNA from stress granules or cytosolic mRNAs from heated HeLa cells were resuspended in 10 µl of  
328 MS water and digested with 0.05 units of nuclease P1 (Wako) and 0.05 units of bacterial alkaline  
329 phosphatase (BAP C75, Takara) in P1 buffer (20 mM ammonium acetate pH 5.3) for 1 h at 37°C.  
330 Samples were store at -20°C before mass spectrometry.

331 Chromatographic separation of the nucleosides was performed with an Easy-nLC1000 on an in-house  
332 packed column (100 µm inner diameter, 50 cm length, 4 µm Synergi Fusion 80 Å pore size from  
333 Phenomenex (Aschaffenburg, Germany) using a gradient from mobile phase A (5 mM ammonium

334 formate pH 5.3) to 32% mobile phase B (100% acetonitrile) for 50 min followed by a second step to  
335 40% B for 8 min, with a flow rate of 200 nl/min.

336 Retention times were monitored using 10 nM solutions of nucleoside standards purchased from  
337 Sigma Aldrich (main nucleosides) and Carbosynh (N1-methyladenosine and N6-methyladenosine).  
338 Nucleosides were injected into a Q Exactive Plus mass spectrometer equipped with a Nanospray Flex  
339 Ion-Source and analysed in the positive mode with a method consisting of full MS and targeted SIM  
340 scans. Full scans were acquired with AGC target value of  $10^6$ , resolution of 70,000 and maximum  
341 injection time of 100 ms. Adenosine, N1-methyladenosine and N6-methyladenosine were monitored  
342 at the respective retention time with a 4-amu isolation window, AGC target value of  $2 \times 10^5$ , 140,000  
343 resolution and maximum injection time of 500 ms.

344 The correct identification of N1- and N6-methyladenosines was proved by fragmentation of the  
345 parent ion using a normalized collision energy of 30 and recording MS/MS scans at a resolution of  
346 70,000, 4.0 m/z isolation window,  $2 \times 10^5$  AGC target and maximum fill time of 120 ms.

347 Manual identification and quantification of nucleosides was performed using Thermo Xcalibur Qual  
348 Browser. Extracted ion chromatograms were generated with a deviation of 0.002 Da from the  
349 theoretical m/z value and the peaks were integrated using the manual peak annotation function.  
350 Absolute amounts of nucleosides were calculated generating an external calibration curve in the range  
351 0.2-3000 fmol by serial dilutions of the nucleoside standards. N1-methyladenosine ( $m^1A$ ) and N6-  
352 methyladenosine ( $m^6A$ ) amounts were reported as percentage of adenosine (A).

353

## 354 **Quantitative Mass Spectrometry**

355 Sample preparation. Pulled down proteins were processed on-beads for LC-MS/MS analysis as  
356 following. Beads were re-suspended in 50  $\mu$ L 8M urea/50 mM Tris HCl pH 8.5, reduced with 10 mM  
357 DTT for 30 min and alkylated with 40 mM chloroacetamide for 20 min at 22°C. Urea was diluted to  
358 a final concentration of 2 M with 25 mM Tris HCl pH 8.5, 10% acetonitrile and proteins were digested



359 with trypsin/lys-C mix overnight at 22°C. Acidified peptides (0.1% trifluoroacetic acid) were  
360 desalted and fractionated on combined C18/SCX stage tips (3 fractions). Peptides were dried and  
361 resolved in 1% acetonitrile, 0.1% formic acid.

362 LC-MS/MS. LC-MS/MS was performed on a Q Exactive Plus equipped with an ultra-high pressure  
363 liquid chromatography unit (Easy-nLC1000) and a Nanospray Flex Ion-Source (all three from  
364 Thermo Fisher Scientific). Peptides were separated on an in-house packed column (100 µm inner  
365 diameter, 30 cm length, 2.4 µm Reprosil-Pur C18 resin) using a gradient from mobile phase A (4%  
366 acetonitrile, 0.1% formic acid) to 30% mobile phase B (80% acetonitrile, 0.1% formic acid) for 60  
367 min followed by a second step to 60% B for 30 min, with a flow rate of 300 nl/min. MS data were  
368 recorded in data-dependent mode selecting the 10 most abundant precursor ions for HCD with a  
369 normalized collision energy of 30. The full MS scan range was set from 300 to 2000 m/z with a  
370 resolution of 70000. Ions with a charge  $\geq 2$  were selected for MS/MS scan with a resolution of 17500  
371 and an isolation window of 2 m/z. The maximum ion injection time for the survey scan and the  
372 MS/MS scans was 120 ms, and the ion target values were set to  $3 \times 10^6$  and  $10^5$ , respectively. Dynamic  
373 exclusion of selected ions was set to 30 s. Data were acquired using Xcalibur software.

374 Data analysis with MaxQuant. MS raw files from five biological replicates of pulldown and  
375 background samples were analyzed with Max Quant (version 1.5.3.30) (Cox and Mann, 2008) using  
376 default parameters. Enzyme specificity was set to trypsin and lysC and a maximum of 2 missed  
377 cleavages were allowed. A minimal peptide length of 7 amino acids was required.  
378 Carbamidomethylcysteine was set as a fixed modification, while N-terminal acetylation and  
379 methionine oxidation were set as variable modifications. The spectra were searched against the  
380 UniProtKB human FASTA database (downloaded in November 2015, 70075 entries) for protein  
381 identification with a false discovery rate of 1%. Unidentified features were matched between runs in  
382 a time window of 2 min. In the case of identified peptides that were shared between two or more  
383 proteins, these were combined and reported in protein group. Hits in three categories (false positives,

384 only identified by site, and known contaminants) were excluded from further analysis. For label-free  
385 quantification (LFQ), the minimum ratio count was set to 1.

386 Data analysis with Perseus. Bioinformatic data analysis was performed using Perseus (version  
387 1.5.2.6) (Tyanova et al., 2016). Proteins identified in the pulldown experiments were further included  
388 in the analysis if they were quantified in at least 4 out of 5 biological replicates in at least one group  
389 (pulldown/background). Missing LFQ values were imputed on the basis of normal distribution with  
390 a width of 0.3 and a downshift of 1.3. Proteins enriched in the pulldown were identified by two-  
391 sample t-test at a permutation-based FDR cutoff of 0.05 and  $s_0 = 0.1$ . Categorical annotations were  
392 added in Perseus and a Fisher's exact test with a p-value threshold of 0.001 was run for GO term  
393 enrichment analysis.

394

### 395 **m1A Motif**

396 The reference set of human genes (11,195 genes) was taken from Khong et al (Khong et al., 2017).  
397 Ensemble Biomart (version 90) was used to select all transcript variants (69,090 transcripts) and to  
398 retrieve the cDNA sequences. The unique transcripts were filtered to select those which match the  
399 exact length reported in Khong et al (Khong et al., 2017) (final set of 9,301 transcripts). The motifs  
400 centered on TTCAA (AGTTCAANNCT, CGTTCAANNCG, GGTTC AANNCC,  
401 TGTTCAANNCA) and centered on TTCGA (AGTTTCGANNCT, CGTTTCGANNCG,  
402 GGTTCGANNCC, TGTTTCGANNCA) were searched separately in all the sequences. A search  
403 algorithm was written in Python for this specific task.

404

### 405 **Bioinformatics Analysis**

406 GO terms enrichment analysis of mRNAs with m1A motif enriched in SG (Khong et al., 2017) and  
407 filtered as described above was performed on line with Panther (Mi et al., 2017) using the  
408 Overrepresentation Test tool (released 2017-12-05) and the GO ontology database (released 2017-

409 11-28). A binomial test with p-value threshold of 0.05 was run using the set of mRNAs neither  
410 enriched nor depleted from SG as reference. GOslim Molecular Function enrichment analysis of the  
411 A $\beta$ -GFP coaggregome was performed with Panther as described above. As input gene names of A $\beta$ -  
412 GFP interactors and of the human genome (all genes in database) were used. FDR cut off for the  
413 Fisher's exact test was set to 0.05.

414

### 415 **Statistical analyses**

416 All repetitions in this study were independent biological repetitions performed at least three times if  
417 not specified differently. To identify significantly increased proteins in pulldowns (RNA over  
418 background binding) in mass spectrometry analyses, a two-sample t-test analysis of grouped  
419 biological replicates was performed using a FDR cutoff of 0.05 with  $s_0 = 0.1$ . Categorical annotation  
420 was added in Perseus and a Fisher exact test with a p-value threshold of 0.05 was run for GOslim  
421 term enrichment analysis. Statistical significance for categorical readouts in microscopy was  
422 analysed by chi-square analysis. Means and standard deviations were calculated from at least three  
423 independent experiments.

424 **References**

- 425 1. M. Safra *et al.*, The m1A landscape on cytosolic and mitochondrial mRNA at single-base  
426 resolution. *Nature*. **551**, 251–255 (2017).
- 427 2. X. Li *et al.*, Base-Resolution Mapping Reveals Distinct m1A Methylome in Nuclear- and  
428 Mitochondrial-Encoded Transcripts. *Mol. Cell*. **68**, 993-1005.e9 (2017).
- 429 3. A. Khong *et al.*, The Stress Granule Transcriptome Reveals Principles of mRNA Accumulation  
430 in Stress Granules. *Mol. Cell*. **68**, 808-820.e5 (2017).
- 431 4. M. A. Kiebler, G. J. Bassell, Neuronal RNA granules: movers and makers. *Neuron*. **51**, 685–  
432 690 (2006).
- 433 5. D. Dominissini *et al.*, The dynamic N(1)-methyladenosine methylome in eukaryotic messenger  
434 RNA. *Nature*. **530**, 441–446 (2016).
- 435 6. A. Khong, S. Jain, T. Matheny, J. R. Wheeler, R. Parker, Isolation of mammalian stress granule  
436 cores for RNA-Seq analysis. *Methods*. **137**, 49–54 (2018).
- 437 7. K. E. Sloan *et al.*, Tuning the ribosome: The influence of rRNA modification on eukaryotic  
438 ribosome biogenesis and function. *RNA Biol*. **14**, 1138–1152 (2017).
- 439 8. N. Kedersha *et al.*, Evidence that ternary complex (eIF2-GTP-tRNA(i)(Met))-deficient  
440 preinitiation complexes are core constituents of mammalian stress granules. *Mol. Biol. Cell*. **13**,  
441 195–210 (2002).
- 442 9. R. M. Vabulas, F. U. Hartl, Protein synthesis upon acute nutrient restriction relies on proteasome  
443 function. *Science*. **310**, 1960–1963 (2005).

- 444 10. Y. E. Kim *et al.*, Soluble Oligomers of PolyQ-Expanded Huntingtin Target a Multiplicity of  
445 Key Cellular Factors. *Mol. Cell.* **63**, 951–964 (2016).
- 446 11. H. Olzscha *et al.*, Amyloid-like aggregates sequester numerous metastable proteins with  
447 essential cellular functions. *Cell.* **144**, 67–78 (2011).
- 448 12. H. Zhou *et al.*, m(1)A and m(1)G disrupt A-RNA structure through the intrinsic instability of  
449 Hoogsteen base pairs. *Nat. Struct. Mol. Biol.* **23**, 803–810 (2016).
- 450 13. E. M. Langdon *et al.*, mRNA structure determines specificity of a polyQ-driven phase  
451 separation. *Science* (2018), doi:10.1126/science.aar7432.
- 452 14. M. Holcik, N. Sonenberg, Translational control in stress and apoptosis. *Nat. Rev. Mol. Cell Biol.*  
453 **6**, 318–327 (2005).
- 454 15. B. Liu, S.-B. Qian, Translational reprogramming in cellular stress response. *Wiley Interdiscip*  
455 *Rev RNA.* **5**, 301–315 (2014).
- 456 16. A. R. La Spada, J. P. Taylor, Repeat expansion disease: progress and puzzles in disease  
457 pathogenesis. *Nat. Rev. Genet.* **11**, 247–258 (2010).
- 458 17. D. P. Virok *et al.*, Protein array based interactome analysis of amyloid- $\beta$  indicates an inhibition  
459 of protein translation. *J. Proteome Res.* **10**, 1538–1547 (2011).
- 460 18. B. Van Treeck *et al.*, RNA self-assembly contributes to stress granule formation and defining  
461 the stress granule transcriptome. *Proc. Natl. Acad. Sci. U.S.A.* **115**, 2734–2739 (2018).
- 462 19. A. Martínez-Limón *et al.*, Recognition of enzymes lacking bound cofactor by protein quality  
463 control. *Proc. Natl. Acad. Sci. U.S.A.* **113**, 12156–12161 (2016).

464 20. J. Schindelin *et al.*, Fiji: an open-source platform for biological-image analysis. *Nat. Methods*.  
465 **9**, 676–682 (2012).

466 21. K. J. Livak, T. D. Schmittgen, Analysis of relative gene expression data using real-time  
467 quantitative PCR and the 2(-Delta Delta C(T)) Method. *Methods*. **25**, 402–408 (2001).

468

469 **Acknowledgments**

470 We thank H. Schwalbe for critical discussion. We thank the ERC (StG-311522 to R.M.V., StG-  
471 309545 to G.G.T) and DFG (EXC115 to R.M.V) for funding. M.H. is funded by DFG CRC  
472 „Molecular Mechanisms of RNA-mediated Regulation”.

473

474 **Author Contributions**

475 R.M.V. conceived and supervised the project. R.M.V., M.H. and G.G.T. conceived the experiments.  
476 M.A., A.M.-L. and G.H. designed and performed the experiments and analyzed the data. G.C.  
477 performed mass spectrometry and analyzed the data. R.D.P., G.G.T. and G.C. performed  
478 bioinformatics analyses. R.M.V. wrote the manuscript with contribution from all authors.

479

480 **Competing Financial Interests**

481 The authors declare no competing financial interests.

482

483 **Supplementary Materials**

484 Figures S1 to S4.

485 Table S1. MaxLFQ Quantitative Data and Identifiers of A $\beta$ -GFP Interactors

486 Table S2. A $\beta$ -GFP Interactors in WT and TRMT61A knock-down HeLa cells

487

488

489

490

491

492

493

494

495

496

497

498

499

500

501

502

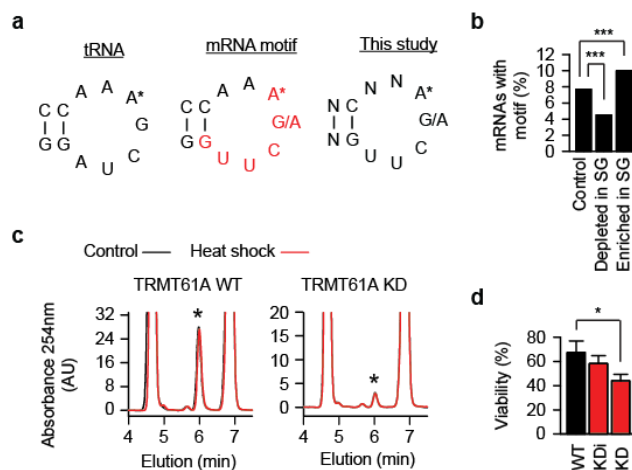

**Figure 1. RNA methyltransferase TRMT6/61A is required during acute proteostasis stress.**

**a**, tRNA, T $\Psi$ C arm of tRNA where adenine 58 (A\*) is N1-methylated by TRMT6/61A. mRNA, mRNA motif (red) targeted by TRMT6/61A for adenine N1-methylation (2). This study, motif used here to predict mRNA targets of TRMT6/61A-mediated adenine N1-methylation.

**b**, Fraction of mRNAs enriched or depleted in stress granules (SG) (3) and containing the m<sup>1</sup>A motif. Control, mRNA set neither enriched nor depleted in SG, \*\*\*p<0.001, chi-square analysis.

**c**, HPLC analysis of N1-methylated adenosine (\*) from cellular tRNAs under normal temperature (37°C) and after 1 h at 45°C.

**d**, Reduced amounts of the methyltransferase correlate with the increased sensitivity to heat shock. WT, wild-type cells with normal amount of TRMT61A; KD and KDi, knock-down cells with strongly reduced and intermediate amounts of TRMT61A, respectively. \*p<0.05, two-tailed t-test; N=3 independent experiments (mean + SD).



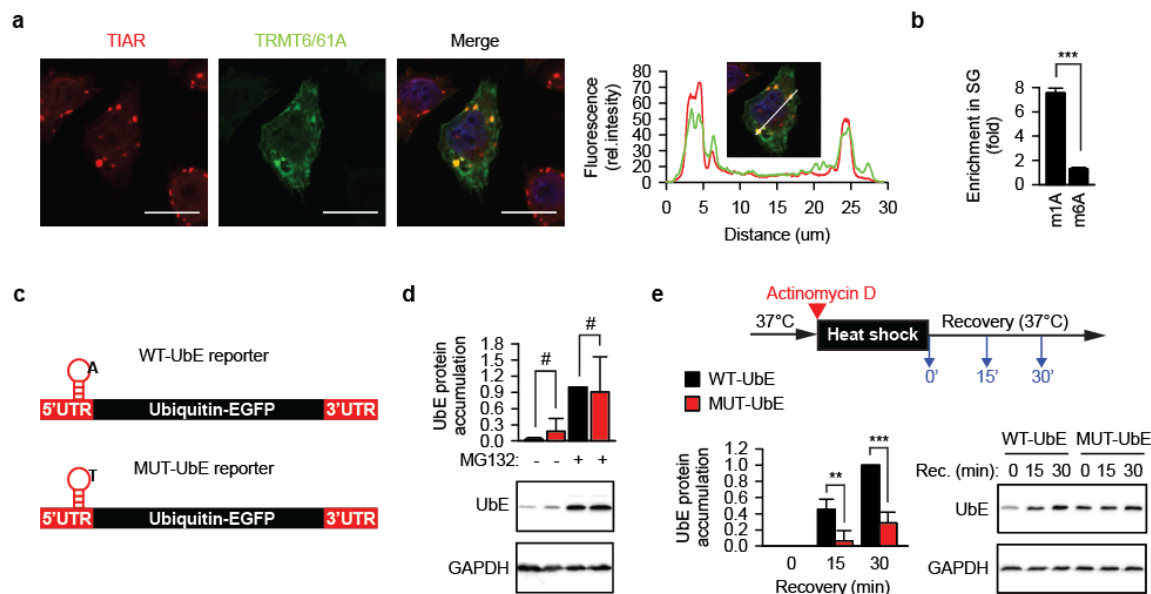

503

504

505 **Figure 2. TRMT6/61A safeguards mRNA during heat shock.**

506 **a**, Localization of TRMT6/61A in arsenite-induced stress granules that are detected with anti-TIAR  
 507 antibody. A representative image from three independent experiments. Scale bar 20 μm. The bar in  
 508 the inset picture indicates the line where the fluorescence profiles were extracted. Red, TIAR; green,  
 509 TRMT6/61A.

510 **b**, N1-methyladenosine is enriched in stress granules compared to cytosolic polyA mRNAs as  
 511 measured by mass spectrometry. m1A, fraction of N1-methyladenosine over unmodified adenosine;  
 512 m6A, fraction of N6-methyladenosine over unmodified adenosine. The respective fraction in  
 513 cytosolic polyA mRNAs was set as 1. \*\*\*p<0.001, two-tailed t-test; N=3 independent experiments  
 514 (mean + SD).

515 **c**, Schematic depiction of the m<sup>1</sup>A motif-containing reporter. UTR, untranslated region. The position  
 516 of the motif on the transcript is indicated. The nucleotide sequence of the motif is shown in Figure  
 517 S5G.

518 **d**, Accumulation of the Ubiquitin-EGFP protein (UbE) from WT-UbE and MUT-UbE transcripts  
 519 during 3 h-long inhibition of proteasomal degradation with 20 μM MG132 (+MG132). One

520 representative anti-EGFP western blot from three independent experiments is shown. GAPDH was  
521 used as loading control. #, not significant difference; two-tailed t-test; N=4 independent experiments  
522 (mean + SD).

523 **e**, Accumulation of UbE protein from WT-UbE and MUT-UbE transcripts during recovery after heat  
524 shock in the presence of actinomycin D to block synthesis of new mRNA molecules. UbE amount at  
525 timepoint 0 was subtracted from all values during recovery. One representative anti-EGFP western  
526 blot is shown. GAPDH was used as loading control. \*\*\*p<0.001, \*\*p<0.01, two-tailed t-test; N=4  
527 independent experiments (mean + SD).

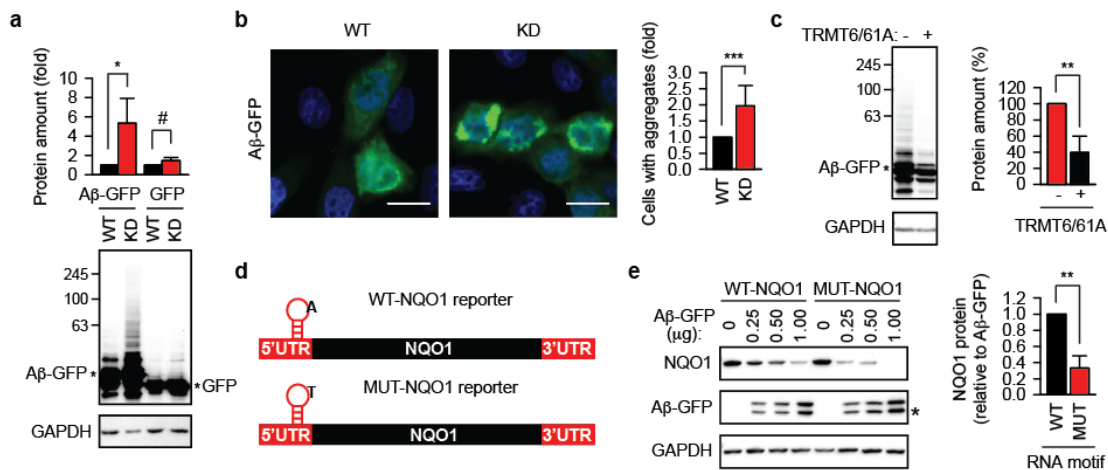

528

529

530

**Figure 3. Lack of the TRMT6/61A-dependent mRNA methylation enhances amyloidogenesis.**

531

**a**, Western blotting of overexpressed Aβ-GFP and GFP. GAPDH was used as loading control.

532

\* $p < 0.05$ ; #, not significant difference; two-tailed t-test;  $N = 3$  independent experiments (mean + SD).

533

**b**, Aggregation of Aβ peptide-GFP fusion protein (Aβ-GFP, green) transiently overexpressed in wild-

534

type (WT) and TRMT61A knock-down (KD) cells. Scale bar 20 μm. \*\*\* $p < 0.001$ , chi-square test on

535

cumulative data from three independent experiments ( $N = 3$ , mean + SD).

536

**c**, Western blotting of overexpressed Aβ-GFP in TRMT61A knock-down cells. TRMT6 and

537

TRMT61A were cotransfected as indicated. GAPDH was used as loading control. \*\* $p < 0.01$ , two-

538

tailed t-test;  $N = 3$  independent experiments (mean + SD).

539

**d**, Schematic depiction of the m<sup>1</sup>A motif-containing NQO1 reporters. UTR, untranslated region. The

540

position of the motif on the transcript is indicated. The nucleotide sequence of the motif is shown in

541

Figure S6B.

542

**e**, Accumulation of NQO1 protein from WT-NQO1 and MUT-NQO1 transcripts 24 h after

543

cotransfection with indicated amounts of Aβ-GFP. One representative anti-FLAG western blot

544

(NQO1) is shown. GAPDH was used as loading control. For quantitative comparison, NQO1 amount

545

per unit of Aβ-GFP was calculated and averaged for all three Aβ-GFP concentrations. This value for

546 WT-NQO1 reporter was set as 1. **\*\*** $p < 0.01$ , two-tailed t-test; N=4 independent experiments (mean +  
547 SD).

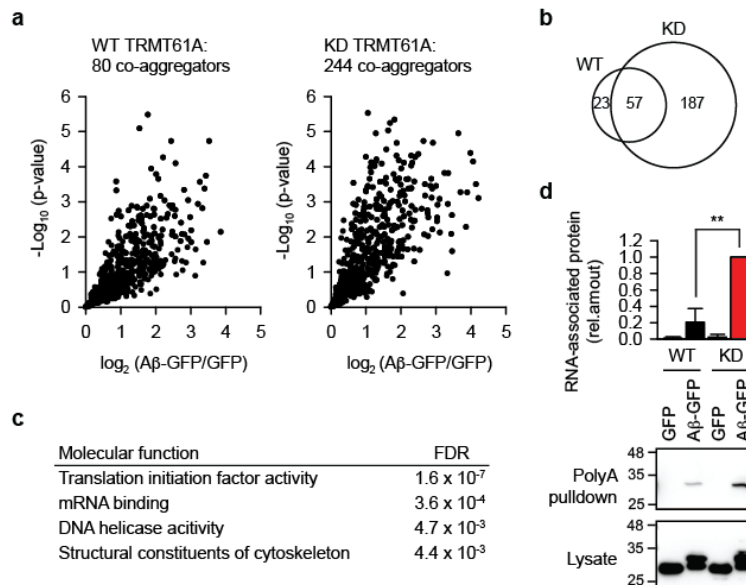

548

549

550 **Figure 4. Co-aggregation of proteins and mRNAs is increased under the defective N1-adenine**  
551 **methylation.**

552 **a**, Mass spectrometry analysis of proteins that co-aggregate with A $\beta$ -GFP in WT or TRMT61A-  
553 deficient HeLa cells 48 hours after transfection. Volcano plot of quantified proteins plotted according  
554 to their enrichment on A $\beta$ -GFP over GFP background with the statistical significance of the  
555 respective ratios plotted on the y-axis. The size of the determined sets is indicated. N=5 independent  
556 experiments.

557 **b**, Overlap between the A $\beta$ -GFP co-aggregators in WT and TRMT61A KD cells.

558 **c**, GO Molecular function categories enriched in the A $\beta$ -GFP co-aggregator set in TRMT61A KD  
559 cells, but not in the co-aggregators in WT cells.

560 **d**, Increased amyloid association with mRNAs in TRMT61A KD cells 24 h after A $\beta$ -GFP  
561 transfection as determined by polyA pulldowns. Transfection of GFP was used as a control.  
562 \*\*p<0.01, two-tailed t-test; N=3 independent experiments (mean + SD).

563

564

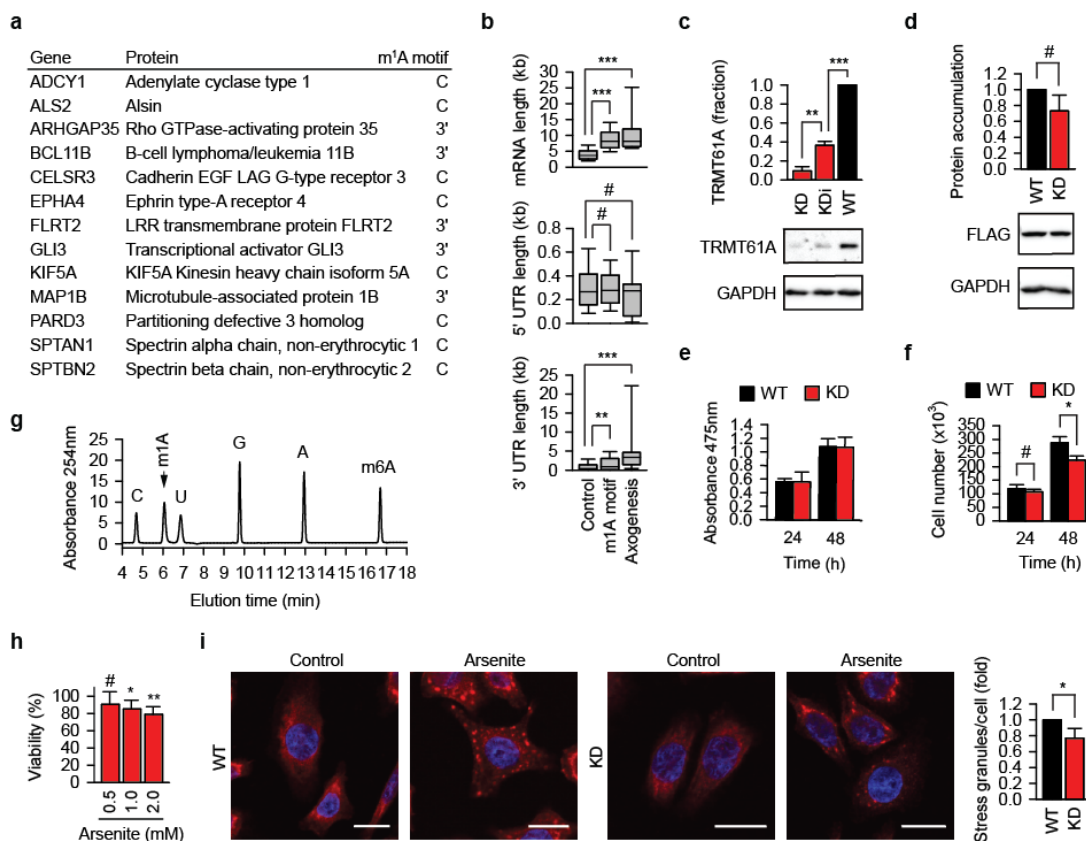

565

566

567 **Figure S1. Characterization of TRMT6/61A and its motif during acute proteostasis stress.**

568 **a**, The list of human genes from GO category “Axonogenesis” that encode mRNA which are enriched  
 569 in SG and contain an m<sup>1</sup>A motif. The position of the motif in the transcript is indicated (C, coding  
 570 region; 3', 3'-UTR).

571 **b**, Distribution among the indicated sets of mRNAs of total, 5'-UTR and 3'-UTR length. Control,  
 572 mRNA set neither enriched nor depleted in SG; m1A motif, mRNAs enriched in SG and containing  
 573 the m<sup>1</sup>A motif; Axonogenesis, SG-enriched mRNA with the m<sup>1</sup>A motif which belong to the GO  
 574 category “Axonogenesis”. \*\*p<0.01, \*\*\*p<0.001, Mann-Whitney test. #, not significant difference.

575 **c**, TRMT61A amount determined by western blotting. GAPDH was used as loading control. WT,  
 576 wild-type HeLa cells; KDi, knock-down with intermediate level of TRMT61A; KD, knock-down

577 with strong reduction of TRMT61A level. \*\* $p < 0.01$ , \*\*\* $p < 0.001$ , two-tailed t-test; N=3 independent  
578 experiments (mean + SD).

579 **d**, Protein synthesis is not affected significantly in TRMT61A knock-down cells as exemplified by  
580 the accumulation of Flag-NQO1 during 24 h after transfection. GAPDH was used as loading control.  
581 WT, wild-type HeLa cells; KD, knock-downs of TRMT61A. #, not significant difference, two-tailed  
582 t-test; N=3 independent experiments (mean + SD).

583 **e**, Cell viability at 37°C is not affected significantly by the reduced level of TRMT61A as measured  
584 by XTT assay. WT, wild-type HeLa cells; KD, knock-downs of TRMT61A. #, not significant  
585 difference, two-tailed t-test; N=3 independent experiments (mean + SD).

586 **f**, Cell proliferation at 37°C is not affected significantly by the reduced level of TRMT61A. WT,  
587 wild-type HeLa cells; KD, knock-downs of TRMT61A. #, not significant difference, two-tailed t-  
588 test; N=3 independent experiments (mean + SD).

589 **g**, HPLC analysis of the 10  $\mu$ M mixture of the ribonucleosides cytidine (C), N1-methylated adenosine  
590 ( $m^1A$ ), uridine (U), guanosine (G), adenosine (A) and N6-methylated adenosine ( $m^6A$ ).

591 **h**, Viability of TRMT61A knock-down cells after arsenite treatment for 1 h in comparison (%) to  
592 wild-type cells at the same concentrations of arsenite. \* $p < 0.05$ , \*\* $p < 0.01$ , two-tailed t-test; #, not  
593 significant difference. N=3 independent experiments (mean + SD).

594 **i**, Immunofluorescence staining of TIAR (red) to detect stress granule formation upon arsenite  
595 treatment for 30 min in serum-free medium. DAPI staining (blue), nuclei. Scale bar 20  $\mu$ m. WT,  
596 wild-type HeLa cells; KD, knock-downs of TRMT61A. \* $p < 0.05$ , two-tailed t-test; N=3 independent  
597 experiments (mean + SD).

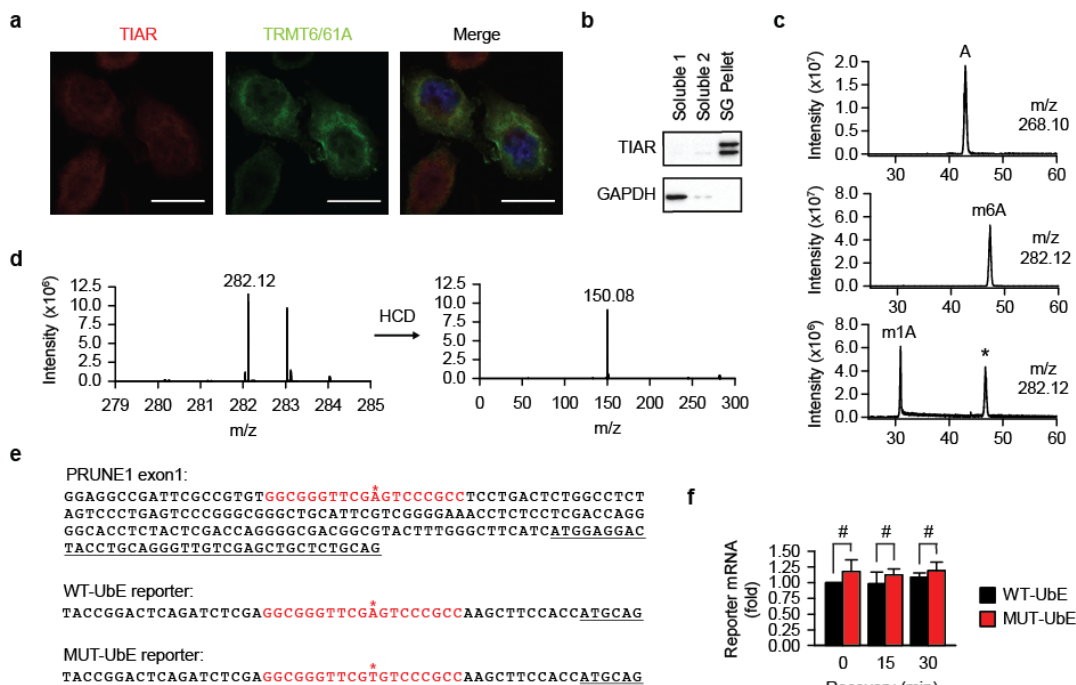

598

599

600

## Figure S2. Experimental tools to analyze mRNA methylation during heat shock.

601 **a**, Localization of TRMT6/61A and TIAR in control cells. A representative image from three  
602 independent experiments. Scale bar 20  $\mu$ m. Red, TIAR; green, TRMT6/61A.

603 **b**, A representative western blot of stress granules (SG pellet) used for mass spectrometry of  
604 methylated adenosine (N=3 independent experiments). GAPDH was used as cytosolic marker.  
605 Soluble 1, Soluble 2, supernatant fractions as described in Method details.

606 **c**, Extracted ion chromatograms of indicated m/z with a range of  $\pm 0.002$  Da. Top, a mixture of four  
607 standard ribonucleosides plus N1-methyladenosine (m1A) and N6-methyladenosine (m6A); middle,  
608 N6-methyladenosine only; bottom, N1-methyladenosine only. A, adenosine. \*, Dimroth  
609 rearrangement of m<sup>1</sup>A to m<sup>6</sup>A.

610 **d**, Spectra of the parent ion (m/z = 282.12) and fragment ion (m/z = 150.08) upon higher-energy  
611 collisional dissociation (HCD). Selected ion monitoring was performed at m/z = 282.12  $\pm$  4 Da.



612 **e**, m<sup>1</sup>A-motif in the 5'-untranslated region of the PRUNE1 gene and in the WT-UbE and MUT-UbE  
613 reporters is marked red. Asterisk indicates adenine methylated by TRMT6/61A. Translated sequence  
614 is underlined.

615 **f**, The amounts of reporter mRNA during recovery after heat shock do not differ significantly as  
616 determined by quantitative PCR. #, not significant difference, two-tailed t-test; N=3 independent  
617 experiments (mean + SD).

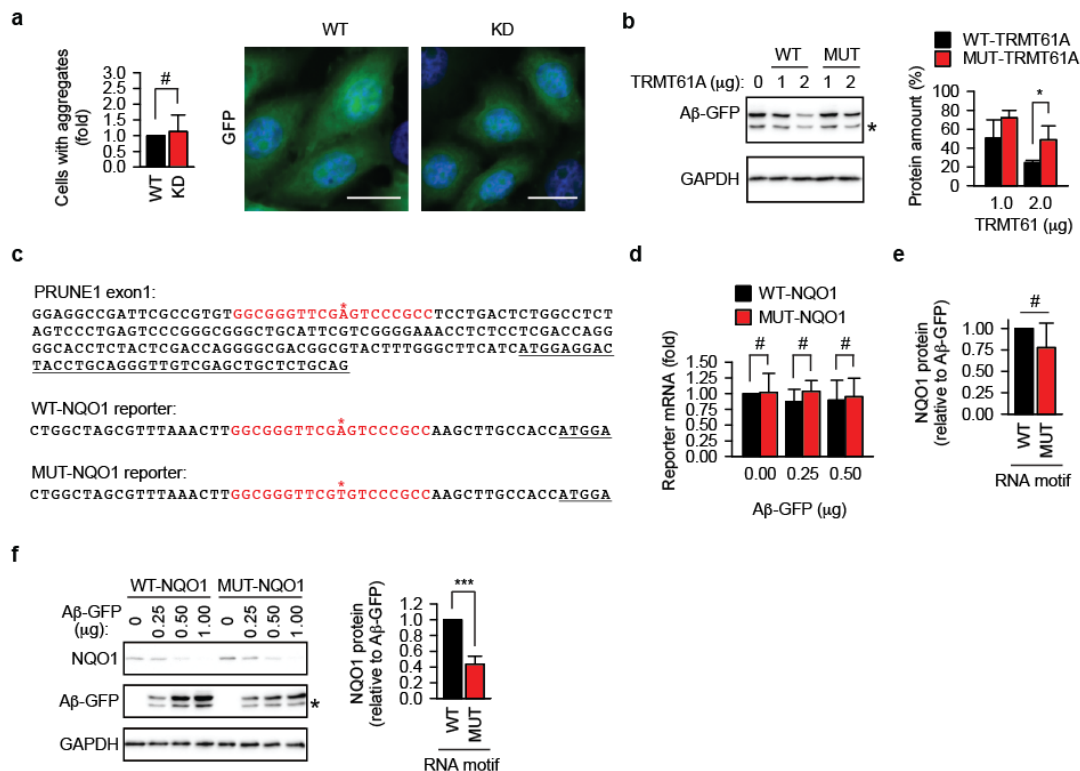

618

619

620

### Figure S3. Analysis of amyloidogenesis in RNA methylation-insufficient cells.

621

**a**, GFP analysis in transiently transfected wild-type (WT) and TRMT61A knock-down (KD) cells.

622

Scale bar 20 μm. #, not significant difference, chi-square test on cumulative data from three

623

independent experiments (N=3, mean + SD).

624

**b**, Activity-impaired TRMT61A mutant (MUT-TRMT61A) cannot suppress the accumulation of Aβ-

625

GFP as efficiently as the wild-type enzyme (WT-TRMT61A) in TRMT61A knock-down HeLa cells.

626

Cells were analyzed by western blotting 24 h after transfection. GAPDH was used as loading control.

627

\*p < 0.05, two-tailed t-test (N=4, mean + SD).

628

**c**, m<sup>1</sup>A-motif in the 5'-untranslated region of the WT-NQO1 and MUT-NQO1 reporters is marked

629

red. Asterisk indicates adenine methylated by TRMT6/61A. Translated sequence is underlined.

630 **d**, The amounts of reporter mRNA do not differ significantly upon 24 h coexpression with A $\beta$ -GFP  
631 as determined by quantitative PCR. #, not significant difference, two-tailed t-test; N=3 independent  
632 experiments (mean + SD).

633 **e**, The difference of NQO1 protein accumulation from WT-NQO1 (WT) and MUT-NQO1 (MUT)  
634 reporter in the presence of A $\beta$ -GFP is not significant in TRMT61A knock-down HeLa cells. #, not  
635 significant difference, two-tailed t-test; N=3 independent experiments (mean + SD).

636 **f**, Accumulation of NQO1 protein from WT-NQO1 and MUT-NQO1 transcripts 24 h after  
637 cotransfection with indicated amounts of A $\beta$ -GFP in murine melanoma B16-F10 cells. One  
638 representative anti-FLAG western blot (NQO1) is shown. GAPDH was used as loading control. For  
639 quantitative comparison, NQO1 amount per unit A $\beta$ -GFP was calculated and averaged for all three  
640 A $\beta$ -GFP concentrations. This value for WT-NQO1 reporter was set as 1. \*\*\*p<0.001, two-tailed t-  
641 test; N=4 independent experiments (mean + SD).

642

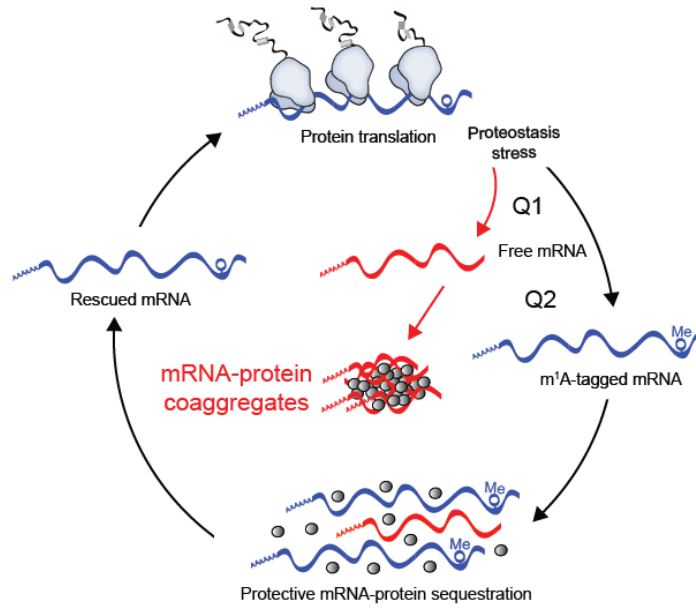

643

644

645 **Figure S4. Orderly mRNA sequestration and aberrant RNA-protein association during**  
646 **proteostasis stress.**

647 A model of mRNA and protein homeostasis during acute (heat shock) and chronic (amyloidogenesis)  
648 proteostasis stress. Two main questions remain open. Q1: Molecular details of the free mRNA  
649 appearance during different types of stress. Q2: The extent and mechanism of m<sup>1</sup>A-tagged mRNA  
650 (blue) involvement in the protective sequestration of non-methylated mRNA (red).

651
